# Supplementary material
Source: PubMed Central journal article supplement (PMC5812774)
Supplement: mmc1.pdf [file mmc1.pdf]

## IVIg for Treatment of Severe Refractory Heparin-Induced Thrombocytopenia

*Anand Padmanabhan, MD, PhD; Curtis G. Jones, BS; Shannon M. Pechauer, BS; Brian R. Curtis, PhD; Daniel W. Bougie, PhD; Mehraboon S. Irani, MD; Barbara J. Bryant, MD; Jack B. Alperin, MD; Thomas G. Deloughery, MD; Kevin P. Mulvey, MD; Binod Dhakal, MD; Renren Wen, PhD; Demin Wang, PhD; and Richard H. Aster, MD*

CHEST 2017; 152(3):478-485

*Online supplements are not copyedited prior to posting and the author(s) take full responsibility for the accuracy of all data.*

e-Fig 1

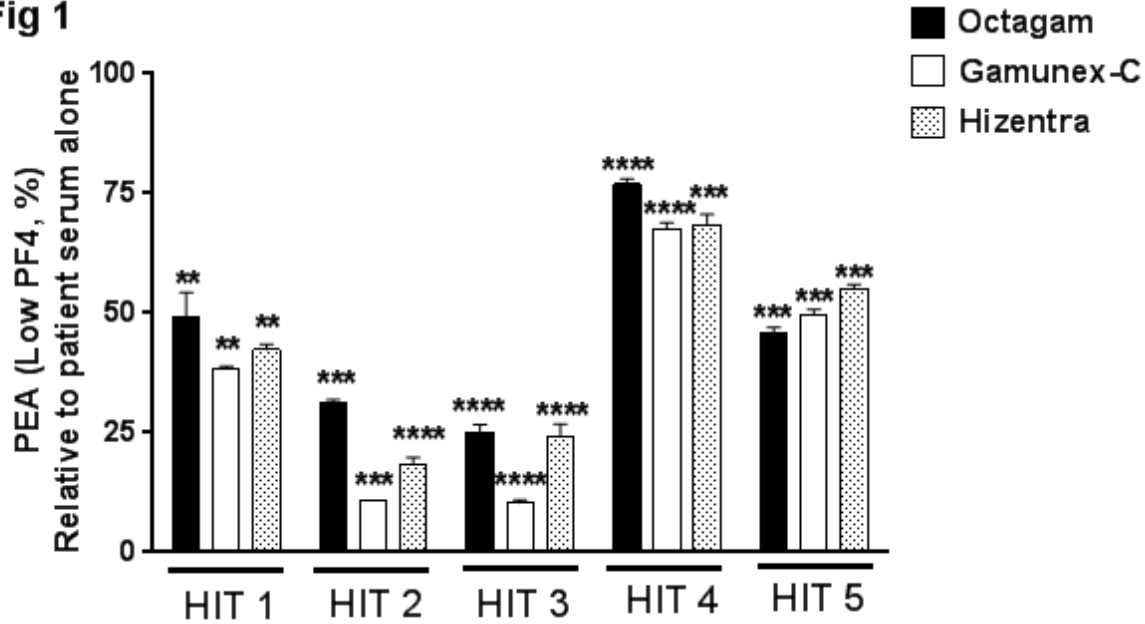

**e-Figure 1. Effect of different IVIg preparations on HIT antibody-mediated platelet activation.** Three different IVIg preparations at concentrations achieved *in vivo* following treatment at the 2 gm/kg dose were added to serum samples obtained from five patients experiencing severe HIT. Samples were tested in the PEA (Low PF4) shown on the ordinate. Figures show mean +1SD of triplicate measurements. Mean values were compared with results obtained with untreated serum using the Student's t-test. Asterisks denote  $p < 0.01$  (\*\*), 0.001, (\*\*\*), and 0.0001 (\*\*\*\*).

e-Fig 2

Patient 1

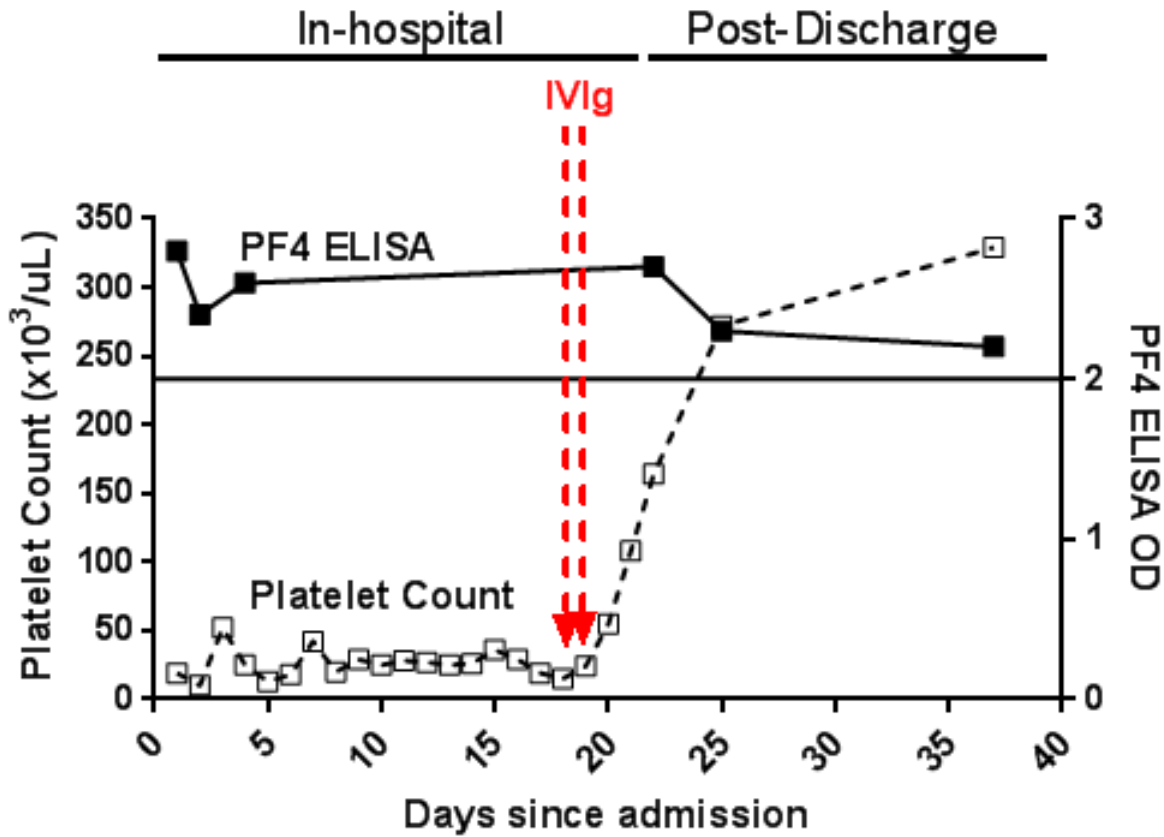

**e-Figure 2. IgG-specific PF4 ELISA is not affected by IVIg treatment.** Platelet counts (Patient 1) are shown on the left ordinate and PF4 ELISA OD results (single measurements) on the right. Horizontal line denotes the threshold for a “very strong” PF4 ELISA test result (2.0 OD). Red dashed arrows indicate IVIg treatment at a dose of 1gm/kg body weight.
